# Supplementary material for: Improvement of Capture Compound Mass Spectrometry Technology (CCMS) for the Profiling of Human Kinases by Combination with 2D LC‐MS/MS
Source: Hindawi journal article supplement (doi:10.1155/2011/850589), 2011-01-01
Supplement: f1 [file 850589.f1.xlsx]

## Sheet: Kinases
Supplementary Table Accompanying Fischer et al.
					Unique Peptides						Spectral counts
	Kinase	Accession Number	Molecular Weight	Kinase family	1D LC 90 min A	1D LC 90 min C	1D LC 180 min A	1D LC 180 min C	2D LC 120 min A	2D LC 120 min C	1D LC 90 min A	1D LC 90 min C	1D LC 180 min A	1D LC 180 min C	2D LC 120 min A	2D LC 120 min C	Fold change A/C 1D LC 90 min	Fold change A/C 1D LC 180 min	Fold change A/C 2D LC 120 min
	Protein kinase C alpha type OS=Homo sapiens GN=PRKCA PE=1 SV=3	KPCA_HUMAN	77 kDa	S/T	6	0	8	0	6	2	13	0	15	0	47	2	2	2	23.5
	Calcium/calmodulin-dependent protein kinase type II subunit delta OS=Homo sapiens GN=CAMK2D PE=1 SV=3	KCC2D_HUMAN	56 kDa	S/T	9	0	10	1	8	4	18	0	27	1	134	14	2	27	9.57143
	Ribosomal protein S6 kinase alpha-3 OS=Homo sapiens GN=RPS6KA3 PE=1 SV=1	KS6A3_HUMAN	84 kDa	S/T	26	2	29	4	15	10	58	4	76	6	252	36	14.5	12.6667	7
	Serine/threonine-protein kinase PLK1 OS=Homo sapiens GN=PLK1 PE=1 SV=1	PLK1_HUMAN	68 kDa	S/T/Y	1	0	0	0	1	1	1	0	0	0	3	1	2	0	3
	5'-AMP-activated protein kinase subunit beta-2 OS=Homo sapiens GN=PRKAB2 PE=1 SV=1	AAKB2_HUMAN	30 kDa	S/T	1	0	1	0	2	0	1	0	1	0	6	0	2	2	2
	5'-AMP-activated protein kinase catalytic subunit alpha-1 OS=Homo sapiens GN=PRKAA1 PE=1 SV=4	AAPK1_HUMAN	64 kDa	S/T/Y	1	0	2	0	3	0	2	0	3	0	38	0	2	2	2
	Tyrosine-protein kinase Fer OS=Homo sapiens GN=FER PE=1 SV=2	FER_HUMAN	95 kDa	Y	3	0	5	0	5	0	6	0	11	0	11	0	2	2	2
	Tyrosine-protein kinase Fyn OS=Homo sapiens GN=FYN PE=1 SV=3	FYN_HUMAN	61 kDa	Y	0	0	0	0	1	0	7	0	3	0	10	0	2	2	2
	Calcium/calmodulin-dependent protein kinase type II subunit alpha OS=Homo sapiens GN=CAMK2A PE=1 SV=2	KCC2A_HUMAN	54 kDa	S/T	1	0	1	0	3	0	5	0	5	0	75	0	2	2	2
	Ribosomal protein S6 kinase alpha-1 OS=Homo sapiens GN=RPS6KA1 PE=1 SV=2	KS6A1_HUMAN	83 kDa	S/T	8	0	10	0	6	0	27	0	42	0	168	0	2	2	2
	3-phosphoinositide-dependent protein kinase 1 OS=Homo sapiens GN=PDPK1 PE=1 SV=1	PDPK1_HUMAN	63 kDa	S/T	2	0	4	0	3	0	4	0	8	0	15	0	2	2	2
	Serine/threonine-protein kinase N2 OS=Homo sapiens GN=PKN2 PE=1 SV=1	PKN2_HUMAN	112 kDa	S/T/Y	3	0	9	0	9	0	4	0	13	0	21	0	2	2	2
	Proto-oncogene tyrosine-protein kinase Src OS=Homo sapiens GN=SRC PE=1 SV=3	SRC_HUMAN	60 kDa	S/T/Y	6	0	6	0	4	0	9	0	9	0	13	0	2	2	2
	Serine/threonine-protein kinase TBK1 OS=Homo sapiens GN=TBK1 PE=1 SV=1	TBK1_HUMAN	84 kDa	S/T	1	0	5	0	8	0	2	0	7	0	26	0	2	2	2
	5'-AMP-activated protein kinase subunit gamma-1 OS=Homo sapiens GN=PRKAG1 PE=1 SV=1	AAKG1_HUMAN	38 kDa	small mol	0	0	2	0	3	0	0	0	3	0	6	0	0	2	2
	Focal adhesion kinase 1 OS=Homo sapiens GN=PTK2 PE=1 SV=2	FAK1_HUMAN	119 kDa	S/T/Y	0	0	2	0	3	0	0	0	2	0	10	0	0	2	2
	Glycogen synthase kinase-3 beta OS=Homo sapiens GN=GSK3B PE=1 SV=2	GSK3B_HUMAN	47 kDa	small mol	0	0	1	0	1	0	0	0	1	0	2	0	0	2	2
	Calcium/calmodulin-dependent protein kinase type II subunit beta OS=Homo sapiens GN=CAMK2B PE=1 SV=2	KCC2B_HUMAN	73 kDa	S/T	0	0	1	0	1	0	0	0	2	0	33	0	0	2	2
	Calcium/calmodulin-dependent protein kinase type II subunit gamma OS=Homo sapiens GN=CAMK2G PE=1 SV=3	KCC2G_HUMAN	63 kDa	S/T	0	0	2	0	2	0	0	0	5	0	43	0	0	2	2
	Calcium/calmodulin-dependent protein kinase kinase 2 OS=Homo sapiens GN=CAMKK2 PE=1 SV=1	KKCC2_HUMAN	65 kDa	S/T	0	0	1	0	1	0	0	0	2	0	1	0	0	2	2
	Protein kinase C delta type OS=Homo sapiens GN=PRKCD PE=1 SV=2	KPCD_HUMAN	78 kDa	S/T	0	0	2	0	5	0	0	0	3	0	22	0	0	2	2
	MAP/microtubule affinity-regulating kinase 3 OS=Homo sapiens GN=MARK3 PE=1 SV=3	MARK3_HUMAN	87 kDa	S/T/Y	0	0	1	0	2	0	0	0	1	0	3	0	0	2	2
	Dual specificity mitogen-activated protein kinase kinase 3 OS=Homo sapiens GN=MAP2K3 PE=1 SV=2	MP2K3_HUMAN	39 kDa	S/T/Y	0	0	1	0	4	0	0	0	1	0	9	0	0	2	2
	Dual specificity mitogen-activated protein kinase kinase 6 OS=Homo sapiens GN=MAP2K6 PE=1 SV=1	MP2K6_HUMAN	37 kDa	S/T/Y	0	0	2	0	3	0	0	0	3	0	9	0	0	2	2
	Serine/threonine-protein kinase N1 OS=Homo sapiens GN=PKN1 PE=1 SV=2	PKN1_HUMAN	104 kDa	S/T/Y	0	0	1	0	5	0	0	0	1	0	8	0	0	2	2
	Exosome component 10 OS=Homo sapiens GN=EXOSC10 PE=1 SV=2	EXOSX_HUMAN	101 kDa	S/T	1	0	0	0	1	0	1	0	0	0	3	0	2	0	2
	AP2-associated protein kinase 1 OS=Homo sapiens GN=AAK1 PE=1 SV=2	AAK1_HUMAN	94 kDa	S/T	0	0	0	0	1	0	0	0	0	0	3	0	0	0	2
	5'-AMP-activated protein kinase catalytic subunit alpha-2 OS=Homo sapiens GN=PRKAA2 PE=1 SV=2	AAPK2_HUMAN	62 kDa	S/T	0	0	0	0	1	0	0	0	0	0	15	0	0	0	2
	Tyrosine-protein kinase ABL2 OS=Homo sapiens GN=ABL2 PE=1 SV=1	ABL2_HUMAN	128 kDa	Y	0	0	0	0	1	0	0	0	0	0	1	0	0	0	2
	Chaperone activity of bc1 complex-like, mitochondrial OS=Homo sapiens GN=CABC1 PE=1 SV=1	ADCK3_HUMAN	72 kDa	S/T	0	0	0	0	2	0	0	0	0	0	2	0	0	0	2
	Serine/threonine-protein kinase 12 OS=Homo sapiens GN=AURKB PE=1 SV=2	AURKB_HUMAN	39 kDa	Y	0	0	0	0	1	0	0	0	0	0	1	0	0	0	2
	cDNA FLJ39204 fis, clone OCBBF2005476, highly similar to Receptor-interacting serine/threonine-protein kinase 1 (EC 2.7.11.1) OS=Homo sapiens PE=2 SV=1	B3KU53_HUMAN	31 kDa	S/T	0	0	0	0	1	0	0	0	0	0	2	0	0	0	2
	Collagen type IV alpha-3-binding protein OS=Homo sapiens GN=COL4A3BP PE=1 SV=1	C43BP_HUMAN	71 kDa	S/T	0	0	0	0	2	1	0	0	0	0	2	1	0	0	2
	Cell division protein kinase 5 OS=Homo sapiens GN=CDK5 PE=1 SV=3	CDK5_HUMAN	33 kDa	S/T	0	0	0	0	3	0	0	0	0	0	5	0	0	0	2
	Dual specificity protein kinase CLK1 OS=Homo sapiens GN=CLK1 PE=1 SV=2	CLK1_HUMAN	57 kDa	S/T	0	0	0	0	1	0	0	0	0	0	2	0	0	0	2
	Tyrosine-protein kinase CSK OS=Homo sapiens GN=CSK PE=1 SV=1	CSK_HUMAN	51 kDa	Y	0	0	0	0	2	0	0	0	0	0	3	0	0	0	2
	Ephrin type-A receptor 7 OS=Homo sapiens GN=EPHA7 PE=1 SV=3	EPHA7_HUMAN	112 kDa	S/T/Y	0	0	0	0	1	0	0	0	0	0	1	0	0	0	2
	Ephrin type-B receptor 4 OS=Homo sapiens GN=EPHB4 PE=1 SV=2	EPHB4_HUMAN	108 kDa	S/T/Y	0	0	0	0	1	1	0	0	0	0	2	1	0	0	2
	Tyrosine-protein kinase FRK OS=Homo sapiens GN=FRK PE=1 SV=1	FRK_HUMAN	58 kDa	Y	0	0	0	0	1	0	0	0	0	0	1	0	0	0	2
	Tyrosine-protein kinase HCK OS=Homo sapiens GN=HCK PE=1 SV=5	HCK_HUMAN	60 kDa	Y	0	0	0	0	1	0	0	0	0	0	1	0	0	0	2
	Hexokinase-1 OS=Homo sapiens GN=HK1 PE=1 SV=3	HXK1_HUMAN	102 kDa	small mol	0	0	0	0	1	0	0	0	0	0	5	0	0	0	2
	Inhibitor of nuclear factor kappa-B kinase subunit epsilon OS=Homo sapiens GN=IKBKE PE=1 SV=1	IKKE_HUMAN	80 kDa	S/T	0	0	0	0	1	0	0	0	0	0	1	0	0	0	2
	Adenylate kinase 2, mitochondrial OS=Homo sapiens GN=AK2 PE=1 SV=2	KAD2_HUMAN	26 kDa	small mol	0	0	0	1	1	0	0	0	0	1	1	0	0	0	2
	cAMP-dependent protein kinase catalytic subunit alpha OS=Homo sapiens GN=PRKACA PE=1 SV=2	KAPCA_HUMAN	41 kDa	S/T	0	0	0	0	1	0	0	0	0	0	1	0	0	0	2
	Creatine kinase B-type OS=Homo sapiens GN=CKB PE=1 SV=1	KCRB_HUMAN	43 kDa	small mol	0	0	0	0	1	0	0	0	0	0	1	0	0	0	2
	Creatine kinase U-type, mitochondrial OS=Homo sapiens GN=CKMT1A PE=1 SV=1	KCRU_HUMAN	47 kDa	small mol	0	0	0	0	2	0	0	0	0	0	3	0	0	0	2
	Ribosomal protein S6 kinase beta-2 OS=Homo sapiens GN=RPS6KB2 PE=1 SV=2	KS6B2_HUMAN	53 kDa	S/T	0	0	0	0	1	0	0	0	0	0	1	0	0	0	2
	Mitogen-activated protein kinase kinase kinase 2 OS=Homo sapiens GN=MAP3K2 PE=1 SV=2	M3K2_HUMAN	70 kDa	S/T/Y	0	0	0	0	1	0	0	0	0	0	1	0	0	0	2
	Serine/threonine-protein kinase MARK2 OS=Homo sapiens GN=MARK2 PE=1 SV=2	MARK2_HUMAN	88 kDa	S/T/Y	0	0	0	0	4	0	0	0	0	0	12	0	0	0	2
	Misshapen-like kinase 1 OS=Homo sapiens GN=MINK1 PE=1 SV=2	MINK1_HUMAN	150 kDa	S/T/Y	0	0	0	0	1	0	0	0	0	0	2	0	0	0	2
	Mitogen-activated protein kinase 8 OS=Homo sapiens GN=MAPK8 PE=1 SV=2	MK08_HUMAN (+2)	48 kDa	S/T	0	0	0	0	1	0	0	0	0	0	1	0	0	0	2
	Dual specificity mitogen-activated protein kinase kinase 4 OS=Homo sapiens GN=MAP2K4 PE=1 SV=1	MP2K4_HUMAN	44 kDa	S/T/Y	0	0	0	0	2	0	0	0	0	0	3	0	0	0	2
	Serine/threonine-protein kinase mTOR OS=Homo sapiens GN=MTOR PE=1 SV=1	MTOR_HUMAN	289 kDa	S/T	0	0	0	0	1	0	0	0	0	0	1	0	0	0	2
	Serine/threonine-protein kinase NIM1 OS=Homo sapiens GN=NIM1 PE=1 SV=1	NIM1_HUMAN	50 kDa	S/T	0	0	0	0	1	0	0	0	0	0	1	0	0	0	2
	N-terminal kinase-like protein OS=Homo sapiens GN=SCYL1 PE=1 SV=1	NTKL_HUMAN	90 kDa	S/T/Y	0	0	0	0	1	0	0	0	0	0	1	0	0	0	2
	Serine/threonine-protein kinase PAK 2 OS=Homo sapiens GN=PAK2 PE=1 SV=3	PAK2_HUMAN	58 kDa	S/T/Y	0	0	0	0	1	0	0	0	0	0	1	0	0	0	2
	Serine/threonine-protein kinase PRP4 homolog OS=Homo sapiens GN=PRPF4B PE=1 SV=2	PRP4B_HUMAN	117 kDa	S/T	0	0	0	0	1	0	0	0	0	0	1	0	0	0	2
	CAD protein OS=Homo sapiens GN=CAD PE=1 SV=3	PYR1_HUMAN	243 kDa	S/T	0	0	0	1	3	0	0	0	0	1	5	0	0	0	2
	Myotonic dystrophy protein kinase variant (Fragment) OS=Homo sapiens PE=2 SV=1	Q59FU6_HUMAN	75 kDa	S/T	0	0	0	0	1	0	0	0	0	0	1	0	0	0	2
	Receptor-interacting serine/threonine-protein kinase 3 OS=Homo sapiens GN=RIPK3 PE=1 SV=2	RIPK3_HUMAN	57 kDa	S/T/Y	0	0	0	0	1	0	0	0	0	0	2	0	0	0	2
	Rho-associated protein kinase 2 OS=Homo sapiens GN=ROCK2 PE=1 SV=4	ROCK2_HUMAN	161 kDa	S/T	0	0	0	0	7	0	0	0	0	0	18	0	0	0	2
	Selenide, water dikinase 1 OS=Homo sapiens GN=SEPHS1 PE=1 SV=2	SPS1_HUMAN	43 kDa	small mol	0	0	0	0	1	0	0	0	0	0	2	0	0	0	2
	Serine/threonine-protein kinase 3 OS=Homo sapiens GN=STK3 PE=1 SV=2	STK3_HUMAN	56 kDa	S/T/Y	0	0	0	0	2	0	0	0	0	0	5	0	0	0	2
	Serine/threonine-protein kinase 4 OS=Homo sapiens GN=STK4 PE=1 SV=2	STK4_HUMAN	56 kDa	S/T/Y	0	0	0	0	1	0	0	0	0	0	3	0	0	0	2
	Protein TBRG4 OS=Homo sapiens GN=TBRG4 PE=1 SV=1	TBRG4_HUMAN	71 kDa	S/T	0	0	0	0	1	0	0	0	0	0	1	0	0	0	2
	Tribbles homolog 1 OS=Homo sapiens GN=TRIB1 PE=1 SV=2	TRIB1_HUMAN	41 kDa	S/T	0	0	0	0	1	0	0	0	0	0	1	0	0	0	2
	Tight junction protein ZO-2 OS=Homo sapiens GN=TJP2 PE=1 SV=1	ZO2_HUMAN	134 kDa	small mol	0	0	0	1	5	3	0	0	0	1	9	5	0	0	1.8
	Pyruvate kinase isozymes M1/M2 OS=Homo sapiens GN=PKM2 PE=1 SV=4	KPYM_HUMAN	58 kDa	small mol	0	0	1	3	9	7	0	0	1	4	17	12	0	0.25	1.41667
	Putative glycerol kinase 3 OS=Homo sapiens GN=GK3P PE=5 SV=2	GLPK3_HUMAN	61 kDa	small mol	0	0	0	0	1	2	0	0	0	0	5	4	0	0	1.25
	Legumain OS=Homo sapiens GN=LGMN PE=1 SV=1	LGMN_HUMAN	49 kDa	S/T	0	0	1	1	1	1	0	0	1	2	5	5	0	0.5	1
	Dephospho-CoA kinase domain-containing protein OS=Homo sapiens GN=DCAKD PE=1 SV=1	DCAKD_HUMAN	27 kDa	small mol	0	0	0	0	1	1	0	0	0	0	1	1	0	0	1
	FAST kinase domain-containing protein 5 OS=Homo sapiens GN=FASTKD5 PE=1 SV=1	FAKD5_HUMAN	87 kDa	S/T	0	0	0	0	1	1	0	0	0	0	2	2	0	0	1
	Mevalonate kinase OS=Homo sapiens GN=MVK PE=1 SV=1	KIME_HUMAN	42 kDa	small mol	0	0	0	0	1	1	0	0	0	0	2	2	0	0	1
	Tyrosine-protein kinase Mer OS=Homo sapiens GN=MERTK PE=1 SV=2	MERTK_HUMAN	110 kDa	Y	0	0	0	1	1	1	0	0	0	2	1	1	0	0	1
	Mitogen-activated protein kinase 1 OS=Homo sapiens GN=MAPK1 PE=1 SV=3	MK01_HUMAN	41 kDa	S/T	0	0	0	0	1	1	0	0	0	0	1	1	0	0	1
	Serine/threonine-protein kinase OSR1 OS=Homo sapiens GN=OXSR1 PE=1 SV=1	OXSR1_HUMAN	58 kDa	S/T/Y	0	0	0	0	2	2	0	0	0	0	4	4	0	0	1
	Pantothenate kinase 2, mitochondrial OS=Homo sapiens GN=PANK2 PE=1 SV=3	PANK2_HUMAN	63 kDa	small mol	0	0	0	0	1	1	0	0	0	0	2	2	0	0	1
	Pantothenate kinase 4 OS=Homo sapiens GN=PANK4 PE=1 SV=1	PANK4_HUMAN	86 kDa	small mol	0	0	0	0	1	1	0	0	0	0	2	2	0	0	1
	Delta-1-pyrroline-5-carboxylate synthase OS=Homo sapiens GN=ALDH18A1 PE=1 SV=2	P5CS_HUMAN	87 kDa	small mol	6	5	12	9	11	12	9	8	19	16	33	37	1.125	1.1875	0.891892
	Adenylate kinase isoenzyme 4, mitochondrial OS=Homo sapiens GN=AK3L1 PE=1 SV=1	KAD4_HUMAN	25 kDa	small mol	0	0	1	0	3	3	0	0	1	0	9	14	0	2	0.642857
	Bifunctional ATP-dependent dihydroxyacetone kinase/FAD-AMP lyase (cyclizing) OS=Homo sapiens GN=DAK PE=1 SV=1	DHAK_HUMAN	59 kDa	small mol	0	1	1	4	7	6	0	1	2	6	17	28	0	0.333333	0.607143
	6-phosphofructokinase, liver type OS=Homo sapiens GN=PFKL PE=1 SV=6	K6PL_HUMAN	85 kDa	small mol	5	8	9	7	6	8	9	12	19	10	22	40	0.75	1.9	0.55
	Phosphoglycerate kinase 1 OS=Homo sapiens GN=PGK1 PE=1 SV=3	PGK1_HUMAN	45 kDa	small mol	0	0	1	1	2	2	0	0	1	1	2	4	0	1	0.5
	Phosphoenolpyruvate carboxykinase [GTP], mitochondrial OS=Homo sapiens GN=PCK2 PE=1 SV=3	PCKGM_HUMAN	71 kDa	small mol	1	1	2	5	3	2	1	1	2	7	5	10	1	0.285714	0.5
	GTP:AMP phosphotransferase mitochondrial OS=Homo sapiens GN=AK3 PE=1 SV=4	KAD3_HUMAN	26 kDa	small mol	0	0	0	0	1	3	0	0	0	0	2	5	0	0	0.4
	Galactokinase OS=Homo sapiens GN=GALK1 PE=1 SV=1	GALK1_HUMAN	42 kDa	small mol	0	0	1	1	2	3	0	0	1	2	3	8	0	0.5	0.375
	Myristoylated alanine-rich C-kinase substrate OS=Homo sapiens GN=MARCKS PE=1 SV=4	MARCS_HUMAN	32 kDa	S/T/Y	0	0	0	0	1	2	0	0	0	0	1	3	0	0	0.333333
	Serine/threonine-protein kinase PLK3 OS=Homo sapiens GN=PLK3 PE=1 SV=2	PLK3_HUMAN	72 kDa	S/T/Y	0	0	0	0	1	1	0	0	0	0	1	3	0	0	0.333333
	Serine/threonine-protein kinase WNK1 OS=Homo sapiens GN=WNK1 PE=1 SV=2	WNK1_HUMAN	251 kDa	S/T/Y	0	0	0	0	1	2	0	0	0	0	1	3	0	0	0.333333
	Calcium/calmodulin-dependent protein kinase type 1 OS=Homo sapiens GN=CAMK1 PE=1 SV=1	KCC1A_HUMAN	41 kDa	S/T	1	0	1	0	0	0	2	0	1	0	0	0	2	2	0
	Nucleoside diphosphate kinase A OS=Homo sapiens GN=NME1 PE=1 SV=1	NDKA_HUMAN	17 kDa	small mol	1	0	2	0	0	0	1	0	2	0	0	0	2	2	0
	Adenosine kinase OS=Homo sapiens GN=ADK PE=1 SV=2	ADK_HUMAN	41 kDa	small mol	0	0	1	0	0	0	0	0	1	0	0	0	0	2	0
	Mitogen-activated protein kinase kinase kinase kinase 4 OS=Homo sapiens GN=MAP4K4 PE=1 SV=2	M4K4_HUMAN	142 kDa	S/T/Y	2	0	2	0	2	0	0	0	1	0	0	0	0	2	0
	NEDD4-binding protein 2 OS=Homo sapiens GN=N4BP2 PE=1 SV=2	N4BP2_HUMAN	199 kDa	small mol	0	0	1	0	0	1	0	0	1	0	0	1	0	2	0
	Phosphatidylinositol 4-kinase alpha OS=Homo sapiens GN=PI4KA PE=1 SV=3	PI4KA_HUMAN	231 kDa	small mol	0	0	1	0	0	1	0	0	1	0	0	1	0	2	0
	Pyridoxal kinase OS=Homo sapiens GN=PDXK PE=1 SV=1	PDXK_HUMAN	35 kDa	small mol	1	0	1	2	0	0	1	0	2	3	0	0	2	0.666667	0
	Phosphatidylinositol-4-phosphate 5-kinase type-1 beta OS=Homo sapiens GN=PIP5K1B PE=1 SV=2	PI51B_HUMAN	61 kDa	small mol	1	0	0	0	0	0	1	0	0	0	0	0	2	0	0
	Proto-oncogene tyrosine-protein kinase Yes OS=Homo sapiens GN=YES1 PE=1 SV=3	YES_HUMAN	61 kDa	S/T/Y	1	0	0	0	1	0	3	0	0	0	1	0	2	0	2
	Serine-protein kinase ATM OS=Homo sapiens GN=ATM PE=1 SV=2	ATM_HUMAN	351 kDa	S/T	0	0	0	0	0	1	0	0	0	0	0	2	0	0	0
	Bifunctional coenzyme A synthase OS=Homo sapiens GN=COASY PE=1 SV=4	COASY_HUMAN	62 kDa	small mol	0	0	0	0	0	1	0	0	0	0	0	2	0	0	0
	Putative hexokinase HKDC1 OS=Homo sapiens GN=HKDC1 PE=2 SV=2	HKDC1_HUMAN	103 kDa	small mol	0	0	0	0	0	2	0	0	0	0	0	3	0	0	0
									63
