# Supplementary material for: Improvement of Capture Compound Mass Spectrometry Technology (CCMS) for the Profiling of Human Kinases by Combination with 2D LC‐MS/MS
Source: Hindawi journal article supplement (doi:10.1155/2011/850589), 2011-01-01
Supplement: f2 [file 850589.f2.docx]

**Supplementary Figures Accompanying:**

**Improvement of Capture Compound Mass Spectrometry (CCMS) Technology for the Profiling of Human Kinases by Combination with 2D LC-MS/MS**

Jenny J. Fischer, Olivia Graebner, Mathias Dreger, Mirko Glinski, Sabine Baumgart, and Hubert Koester

Analytics department, caprotec bioanalytics GmbH, Volmerstrasse 5, 12489 Berlin, Germany

**MS spectra of kinases identified by one single peptide**

PRP4B_HUMAN

AAPK2_HUMAN

NIM1_HUMAN

Serine/threonine-protein kinase PRP4 homolog OS=Homo sapiens GN=PRPF4B PE=1 SV=2

Tyrosine-protein kinase Fyn OS=Homo sapiens GN=FYN PE=1 SV=3

Hexokinase-1 OS=Homo sapiens GN=HK1 PE=1 SV=3

Q59FU6_HUMAN

Misshapen-like kinase 1 OS=Homo sapiens GN=MINK1 PE=1 SV=2

AURKB_HUMAN

Creatine kinase B-type OS=Homo sapiens GN=CKB PE=1 SV=1

CLK1_HUMAN

B3KU53_HUMAN

KKCC2_HUMAN

ABL2_HUMAN

CDK14_HUMAN

HCK_HUMAN

Tyrosine-protein kinase FRK OS=Homo sapiens GN=FRK PE=1 SV=1

Inhibitor of nuclear factor kappa-B kinase subunit epsilon OS=Homo sapiens GN=IKBKE PE=1 SV=1

M3K2_HUMAN

MTOR_HUMAN

Tyrosine-protein kinase JAK3 OS=Homo sapiens GN=JAK3 PE=1 SV=2

AKAP9_HUMAN

Q6LD14_HUMAN

Nucleoside diphosphate kinase A OS=Homo sapiens GN=NME1 PE=1 SV=1

ATM_HUMAN

Fructosamine-3-kinase OS=Homo sapiens GN=FN3K PE=1 SV=1

B4DIG8_HUMAN

PIM2_HUMAN

KAP2_HUMAN

Mitogen-activated protein kinase kinase kinase kinase 5 OS=Homo sapiens GN=MAP4K5 PE=1 SV=1

STK6_HUMAN

JAK1_HUMAN

BLK_HUMAN

Phosphatidylinositol-4-phosphate 5-kinase type-1 beta OS=Homo sapiens GN=PIP5K1B PE=1 SV=2

BCAP_HUMAN

RAC-alpha serine/threonine-protein kinase OS=Homo sapiens GN=AKT1 PE=1 SV=2

HIPK3_HUMAN

Diacylglycerol kinase iota OS=Homo sapiens GN=DGKI PE=1 SV=1

C-Jun-amino-terminal kinase-interacting protein 4 OS=Homo sapiens GN=SPAG9 PE=1 SV=4

LYN_HUMAN

MAK_HUMAN

AKAP1_HUMAN

SRPK3_HUMAN

CAMKV_HUMAN

KAP0_HUMAN

KSR2_HUMAN

M3K3_HUMAN

Dual specificity protein kinase TTK OS=Homo sapiens GN=TTK PE=1 SV=2

cGMP-dependent protein kinase 1 OS=Homo sapiens GN=PRKG1 PE=1 SV=3

Mitogen-activated protein kinase associated protein 1 (Fragment) OS=Homo sapiens GN=MAPKAP1 PE=4 SV=1

Adenosine kinase OS=Homo sapiens GN=ADK PE=1 SV=2

Rho-associated protein kinase 1

cDNA FLJ75392, highly similar to Homo sapiens hexokinase II (HKII) mRNA OS=Homo sapiens PE=2 SV=1

cDNA FLJ56606, highly similar to Serine/threonine-protein kinase TAO2 (EC 2.7.11.1) OS=Homo sapiens PE=2 SV=1

Mitogen-activated protein kinase kinase kinase 4 OS=Homo sapiens GN=MAP3K4 PE=1 SV=2

Serine/threonine-protein kinase PAK 6 OS=Homo sapiens GN=PAK6 PE=1 SV=1

FGFR2_HUMAN

TRPM6_HUMAN

TBRG4_HUMAN

OBSCN_HUMAN

TRIO_HUMAN

PAPS1_HUMAN

TRI27_HUMAN

Tribbles homolog 1 OS=Homo sapiens GN=TRIB1 PE=1 SV=2

KALRN_HUMAN

EPHA7_HUMAN

AAK1_HUMAN

STK4_HUMAN

COASY_HUMAN

TBRG4_HUMAN

TRIB1_HUMAN

PAK2_HUMAN

KAPCA_HUMAN

NTKL_HUMAN

MK08_HUMAN

SPS1_HUMAN

KS6B2_HUMAN

HCK_HUMAN
